# Supplementary material for: A 3D-printed framework with a gradient distributed heterojunction and fast Li+conductivity interfaces for high-rate lithium metal anodes
Source: Royal Society of Chemistry journal article supplement (doi:10.1039/d2ta06636j), 2022-01-01
Supplement: d2ta06636j1.pdf [file d2ta06636j1.pdf]

Supporting Information

## **3D-printed framework with gradient distributed heterojunction and fast Li<sup>+</sup> conductivity interfaces for high-rate lithium metal anodes**

Shuo Wang<sup>a</sup>, Haiting Shi<sup>a\*</sup>, Yuanhua Xia<sup>b</sup>, Dong Liu<sup>b</sup>, Chunying Min<sup>c</sup>, Ming Zeng<sup>a</sup>,  
Sirui Liang<sup>a</sup>, Ruiqi Shao<sup>a</sup>, Xiaoqing Wu<sup>a</sup>, Zhiwei Xu<sup>a\*</sup>

<sup>a</sup>State Key Laboratory of Separation Membranes and Membrane Processes, School of Textile Science and Engineering, Tiangong University, Tianjin, China, 300387

<sup>b</sup>Key Laboratory of Neutron Physics, Institute of Nuclear Physics and Chemistry, China Academy of Engineering Physics, Mianyang, China, 621999

<sup>c</sup>Research School of Polymeric Materials, School of Materials Science & Engineering, Jiangsu University, Zhenjiang, Jiangsu, China, 212013

### **Nanoindentation experiment**

The nanoindentation experiment was completed by Nanoindenter XP (Hysitron TI 980 TriboIndenter, Germany) with a diamond (Berkovich) indenter. The constant loading rate (dP/dt as a constant) mode is used in the stiffness test of the sample. The sample test process is followed by loading for 20 s, holding for 15 s, unloading to 10% of the maximum load, and holding for 60 s. The hardness H is calculated by the O&P method.

### **DFT calculation**

On the basis of the density functional theory (DFT), all calculations were performed by spin-polarized version of Vienna ab initio simulation package (VASP) in Mede A software. The projected augmented wave method (PAW) was adopted to describe the

---

\* Corresponding author. E-mail address: shihaiting@tiangong.edu.cn (Haiting Shi); xuzhiwei@tiangong.edu.cn (Zhiwei Xu)

electron-ion interactions. The Perdure–Burke–Ernzerhof (PBE) version of the generalized gradient approximation (GGA) was used for exchange-correlation potentials. DFT-D2 method of Grimme was employed to correctly describe van der Waals interactions. The cutoff energy for plane wave basis was set to be 400 eV, which was sufficient for a good energy convergence. The conjugate gradient method scheme was applied for the structural optimization with the convergence criterion of energy in  $10^{-5}$  eV and of force on each atom in  $0.02$  eV  $\text{\AA}^{-1}$ . To eliminate the interactions between the separated nanosheets, a vacuum space of  $15$   $\text{\AA}$  was set in c direction with the periodic boundary conditions in a and b directions. The corresponding Brillouin zone integration was carried out using  $3 \times 3 \times 1$  k-point meshes by Monkhorst–Pack scheme.

Table S1 Electronic conductivity of different sides of 3D frameworks

| Times | Top side ( $\text{S m}^{-1}$ ) | Bottom side ( $\text{S m}^{-1}$ ) |
|-------|--------------------------------|-----------------------------------|
| 1     | 3.15                           | 1.75                              |
| 2     | 2.59                           | 2.17                              |
| 3     | 2.96                           | 2.34                              |

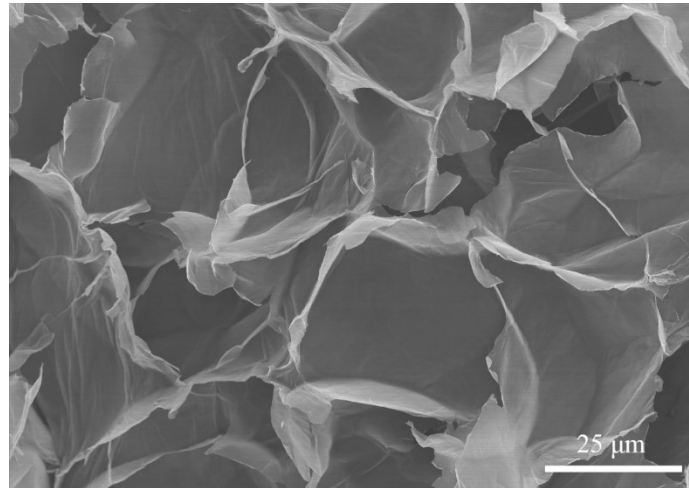

Figure S1 Side views for the top section without  $\gamma\text{-Al}_2\text{O}_3$ .

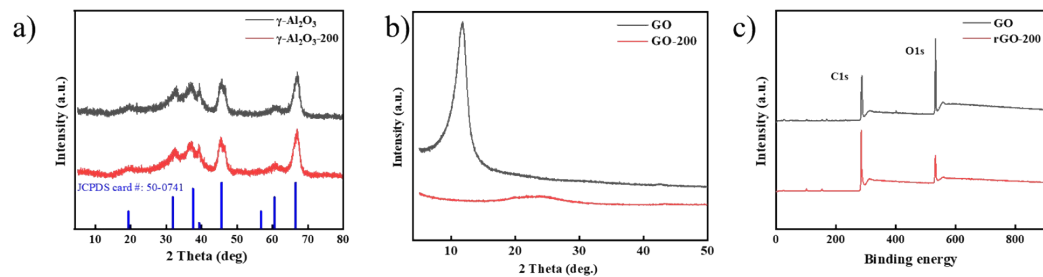

Figure S2 a) XRD patterns of pristine  $\gamma$ -Al<sub>2</sub>O<sub>3</sub> and annealing  $\gamma$ -Al<sub>2</sub>O<sub>3</sub>. b) XRD patterns of GO and GO-200. c) XPS patterns of GO and annealing GO.

Table S2 Chemical composition of samples determined from XPS spectra

| Samples | Element content (at%) |      |      | % of total C1s |      |       |
|---------|-----------------------|------|------|----------------|------|-------|
|         | C                     | O    | C=C  | C-C/C-N        | C-O  | O=C-O |
| GO      | 67.3                  | 32.7 | 29.8 | 17.3           | 43.3 | 9.6   |
| GO-200  | 79.5                  | 20.5 | 51.9 | 29.4           | 4.6  | 14.1  |

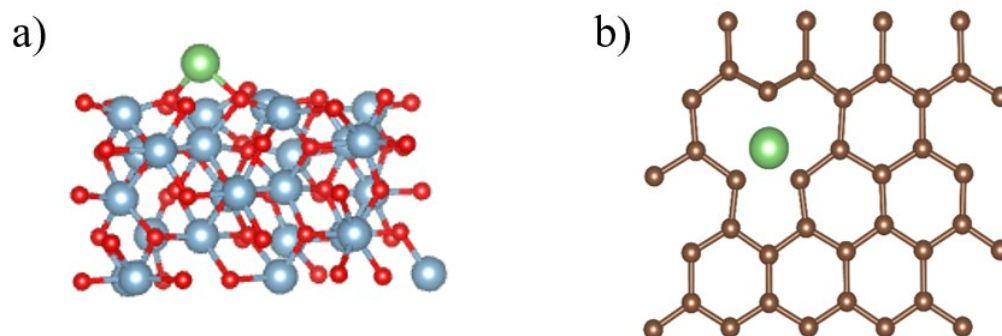

Figure S3 calculation model of a)  $\gamma$ -Al<sub>2</sub>O<sub>3</sub> and b) graphene with two atomic defects.

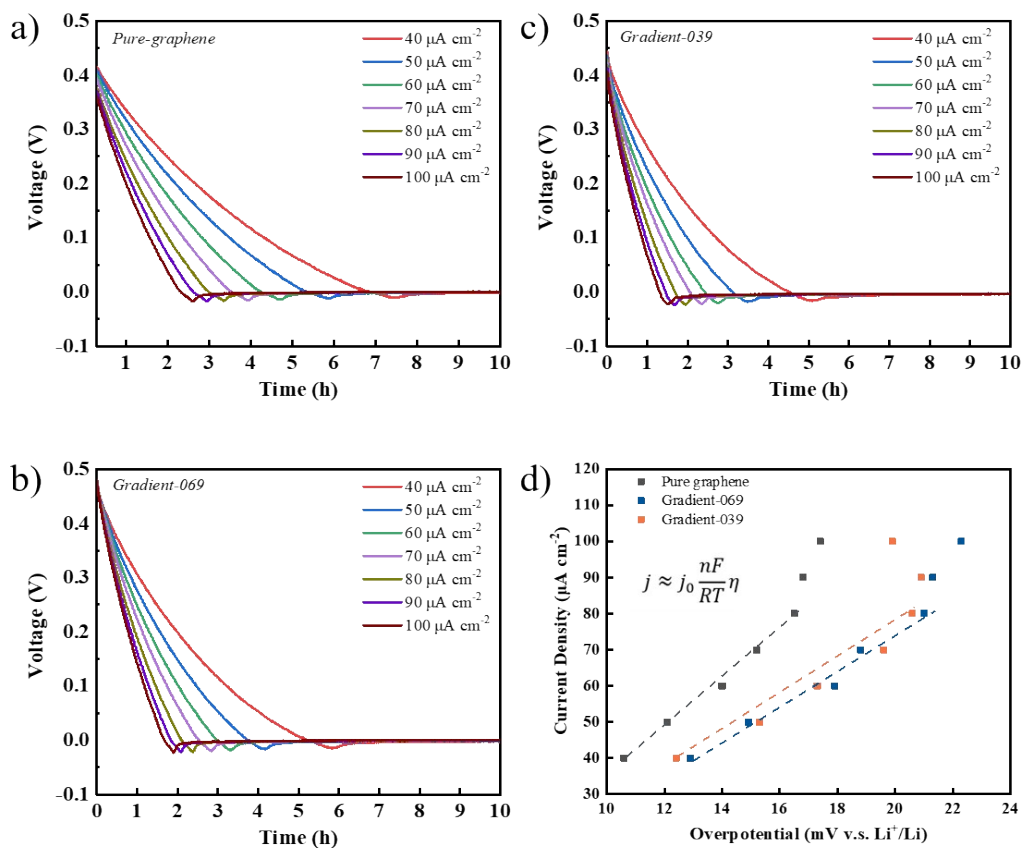

Figure S4 a-c) The overpotential ( $\eta$ ) at different current densities ( $j$ ) for three types of frameworks. d) The relationship between overpotential ( $\eta$ ) and current densities ( $j$ ).

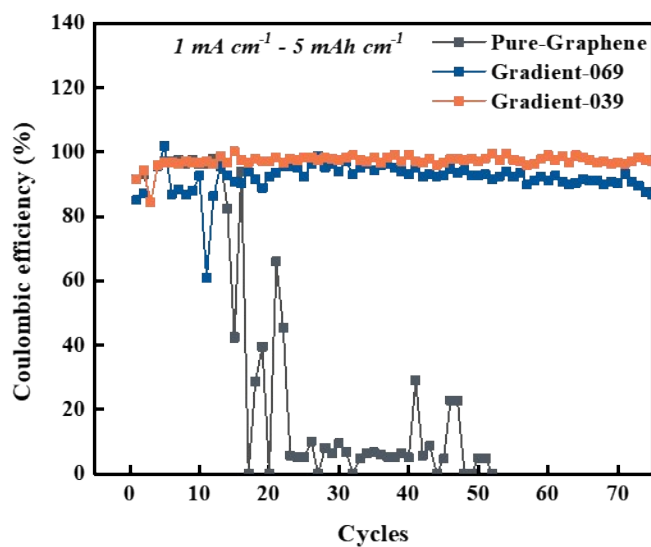

Figure S5 a) Coulombic efficiency of 3D frameworks at  $1 \text{ mA cm}^{-2}$  for  $5 \text{ mAh cm}^{-2}$ .

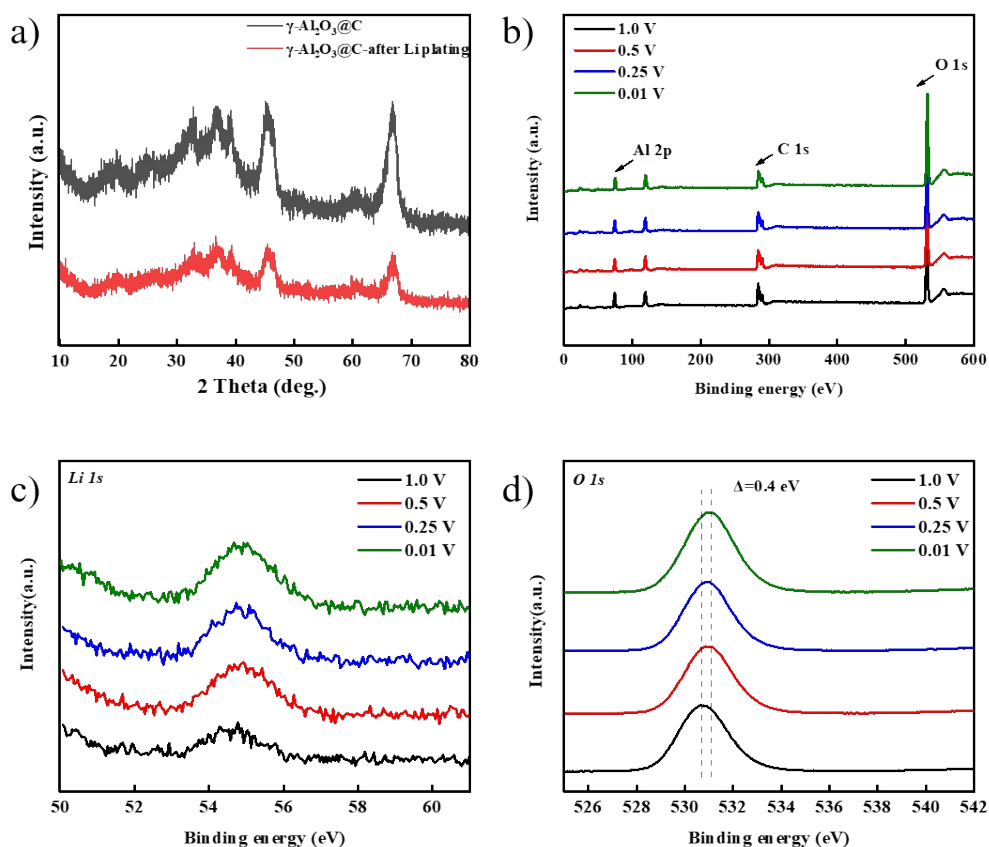

Figure S6 a) XRD patterns of the  $\gamma$ - $\text{Al}_2\text{O}_3$ @graphene slurry electrode before and after  $1 \text{ mAh cm}^{-2}$  Li plating. b) XPS patterns of the  $\gamma$ - $\text{Al}_2\text{O}_3$ @graphene slurry electrode with different depth of discharge. c-d) Li 1s and O 1s spectra with different depth of discharge.

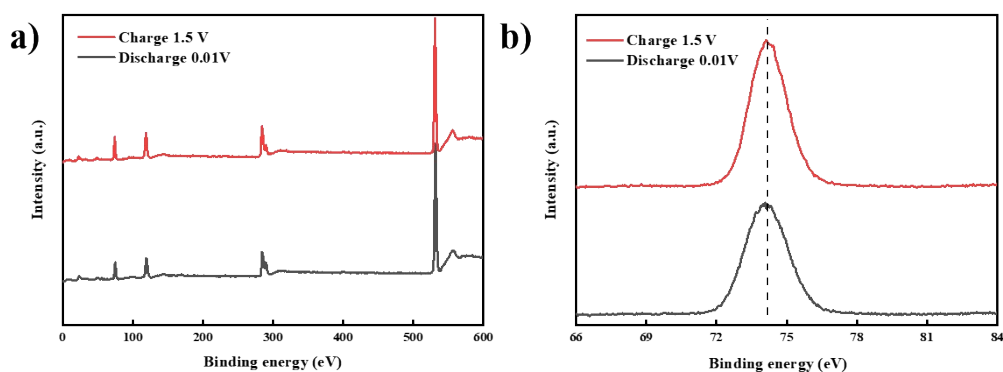

Figure S7, a) XPS patterns of the  $\gamma$ - $\text{Al}_2\text{O}_3$ @graphene slurry electrode with discharge to 0.01V and charge to 1.5 V. b) The Al 2p XPS spectra of the slurry electrode with

discharge to 0.01V and charge to 1.5 V

Table S3 Latest cycle stability of lithium metal batteries and full cells.

| Materials                                                           | Cycle stability in symmetrical cells                            | Full cell performance (LFP cathode)                                                                                                                                                         | Ref.      |
|---------------------------------------------------------------------|-----------------------------------------------------------------|---------------------------------------------------------------------------------------------------------------------------------------------------------------------------------------------|-----------|
| 3D flexible MXene@Au host                                           | 650 hours at 1 mA cm <sup>-2</sup> , 1 mAh cm <sup>-2</sup>     | 131.41 mAh g <sup>-1</sup> at 1 C with a high capacity retention rate of 98.47%.                                                                                                            | 1         |
| Ultrafine TiO <sub>2</sub> confined in 3D freestanding carbon paper | 550 hours at 0.5 mA cm <sup>-2</sup> , 0.5 mAh cm <sup>-2</sup> | An initial capacity of 128 mAh g <sup>-1</sup> after 250 cycles with 99.2% Coulombic efficiency.                                                                                            | 2         |
| Multifunctional SnSe-C composite modified 3D scaffolds              | 1100 hours at 1 mA cm <sup>-2</sup> , 1 mAh cm <sup>-2</sup>    | A discharge capacity of 102.7 mAh g <sup>-1</sup> at 2 C rate and still retains 87.2 mAh g <sup>-1</sup> after 750 cycles.                                                                  | 3         |
| Conformal coating of lithium-zinc alloy on 3D conducting scaffold   | 400 hours at 1 mA cm <sup>-2</sup> , 1 mAh cm <sup>-2</sup>     | A high capacity of 145.2 mAh g <sup>-1</sup> after 150 cycles at 0.2 C                                                                                                                      | 4         |
| MnO <sub>2</sub> Nanoflower Arrays@Ni Foam                          | 2000 hours at 1 mA cm <sup>-2</sup> , 1 mAh cm <sup>-2</sup>    | A capacity of 138.8 mAh g <sup>-1</sup> and retains a high capacity retention of 81.2% over 800 cycles at 2 C.                                                                              | 5         |
| lithiophilic 3D skeleton via a versatile MOF-derived route          | 1000 hours at 2 mA cm <sup>-2</sup> , 1 mAh cm <sup>-2</sup>    | ~140 mAh g <sup>-1</sup> after 400 cycles at 1 C                                                                                                                                            | 6         |
| 3D-printed gradient framework                                       | 1500 hours at 1 mA cm <sup>-2</sup> and 1 mAh cm <sup>-2</sup>  | A reversible capacity of 176.8 mAh g <sup>-1</sup> at 0.5 C decreased to 130.8 mAh g <sup>-1</sup> at 5 C and capacity retention of 98% after 50 cycles under 0.5 C after rate performance. | This work |

## References

1. Y. Qian, C. Wei, Y. Tian, B. Xi, S. Xiong, J. Feng and Y. Qian, *Chem. Eng. J.*, 2021, **421**, 129685.
2. Y. Tian, Y. An, C. Wei, Y. Tao, Y. Zhang, H. Jiang, L. Tan, J. Feng and Y. Qian, *Chem. Eng. J.*, 2021, **406**, 126836.
3. X. Shen, G. Zhao, X. Yu, H. Huang, M. Wang and N. Zhang, *J. Mater. Chem. A*, 2021, **9**, 21695-21702.
4. H. Song, T. He, J. Liu, Y. Wang, X. L. Li, J. Liu, D. Zhang, H. Y. Yang, J. Hu and S. Huang, *Carbon*, 2021, **181**, 99-106.
5. Y. Fan, H. Li, X. He, Y. Huang, C. Sun, T. Zhu, H. Liu, E. Huangzhang, F. Sun and J. Nan, *ACS Appl. Energy Mater.*, 2022, **5**, 10034-10044.
6. L. Zeng, T. Zhou, X. Xu, F. Li, J. Shen, D. Zhang, J. Liu and M. Zhu, *Science China Materials*, 2022, **65**, 337-348.
